# Supplementary material
Source: Springer Nature journal article supplement (https://www.springermedizin.de/resource/supplementary/12955_2006_265_MOESM2_ESM.pdf/9560018)

# Physical Component

**A**

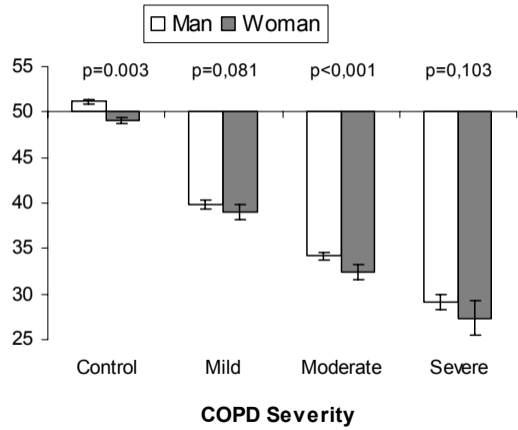

# Mental Component

**B**

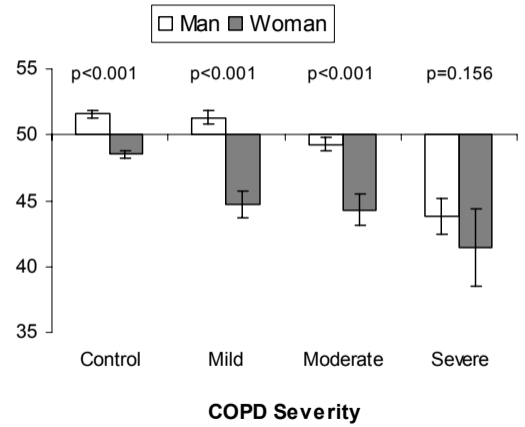

Supplement: MOESM2 [file 9560018]
